# Supplementary material for: Mechanisms of Ganweikang Tablets against Chronic Hepatitis B: A Comprehensive Study of Network Analysis, Molecular Docking, and Chemical Profiling
Source: Hindawi journal article supplement (doi:10.1155/2023/8782892), 2023-01-01
Supplement: f1 [file 8782892.f1.zip]

# Mechanisms of Ganweikang Tablets against Chronic Hepatitis B: A Comprehensive Study of Network Analysis, Molecular Docking and Chemical Profiling

Jia-Qi Xu<sup>1,2</sup>, Shi-Bing Su<sup>3</sup>, CY Chen<sup>4,6</sup>, J Gao<sup>6,7</sup>, ZM Cao<sup>4,6</sup>, JL Guan<sup>5,6</sup>, Lin-Xuan Xiao<sup>1</sup>, Mingming Zhao<sup>1</sup>, Hua Yu<sup>1\*</sup>, Yuan-Jia Hu<sup>1,2\*</sup>

Supplementary figures:

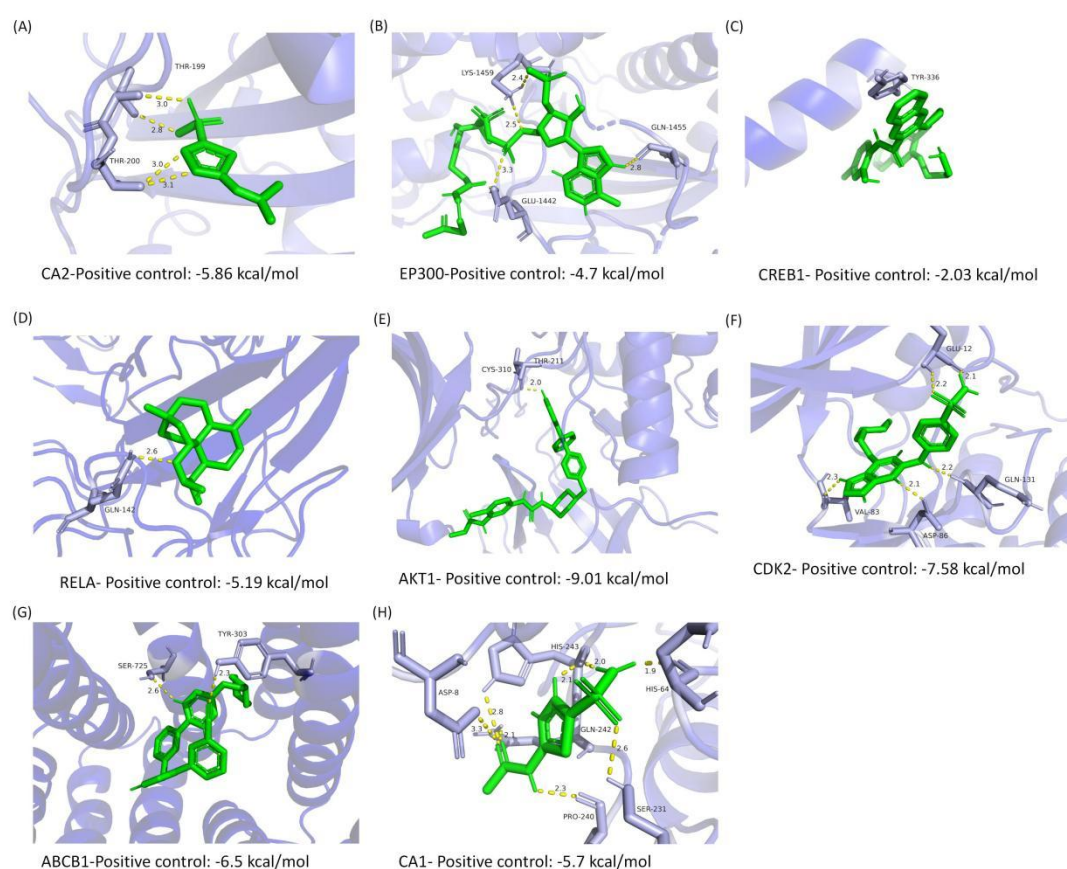

Figure S1 Schematic diagrams for the binding modes between targets and positive control small molecules

(A) CA2 with positive control; (B) EP300 with positive control; (C) CREB1 with positive control; (D) RELA with positive control; (E) AKT1 with positive control; (F) CDK2 with positive control; (G) ABCB1 with positive control; (H) CA1 with positive control

(A)

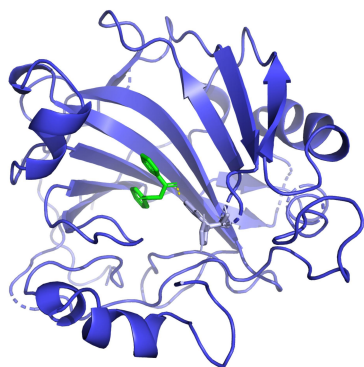

CA2- DBM : -6.33 kcal/mol

(B)

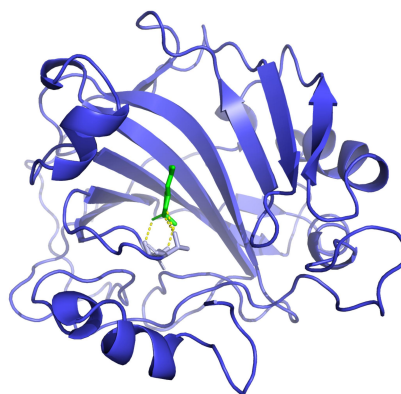

CA2- Positive control: -5.86 kcal/mol

(C)

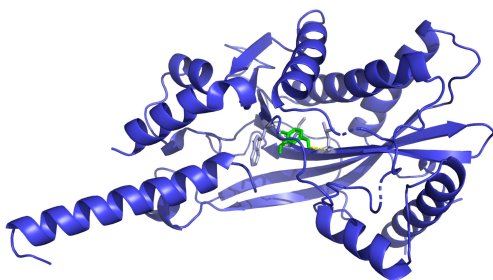

EP300-vanillin: -6.26 kcal/mol

(D)

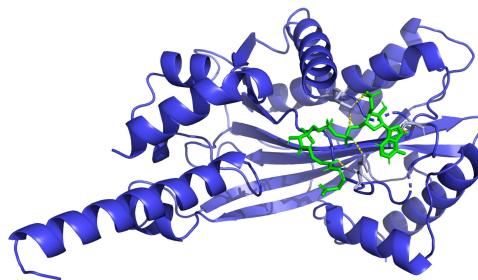

EP300-Positive control: -4.7 kcal/mol

(E)

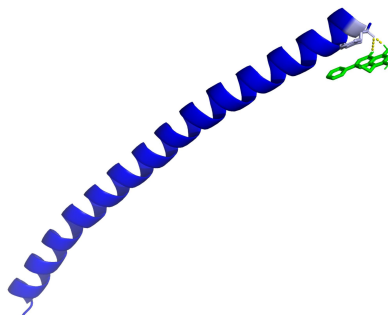

CREB1- wogonin: -3.67 kcal/mol

(F)

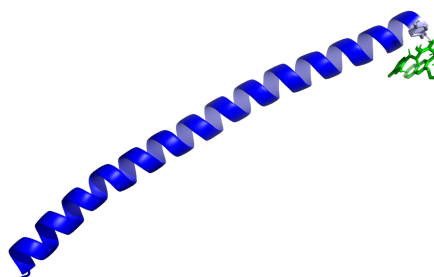

CREB1-Positive control: -2.03 kcal/mol

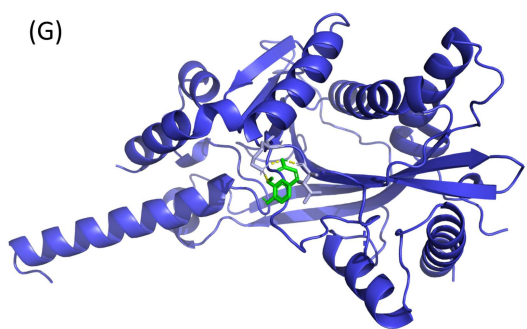

EP300-cis-ferulic acid: - 5.47kcal/mol

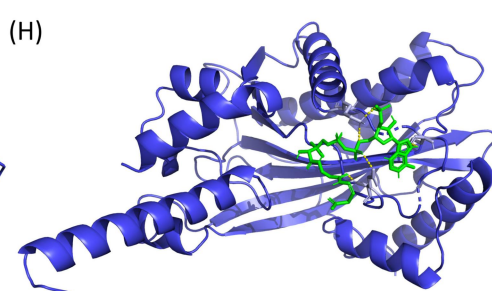

EP300-Positive control: - 4.7kcal/mol

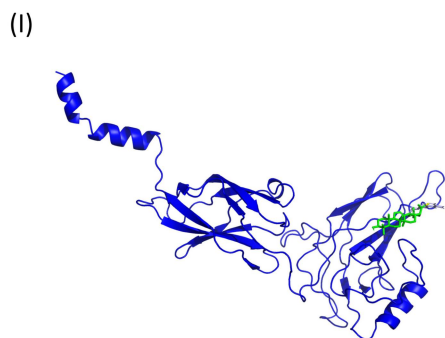

RELA- oleanolic acid: -6.87 kcal/mol

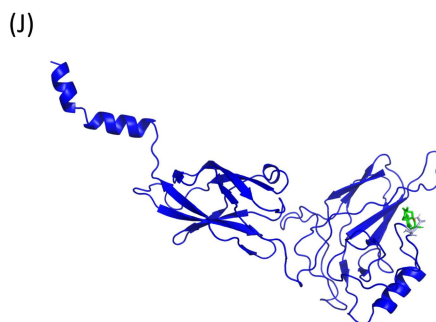

RELA-Positive control: -5.19 kcal/mol

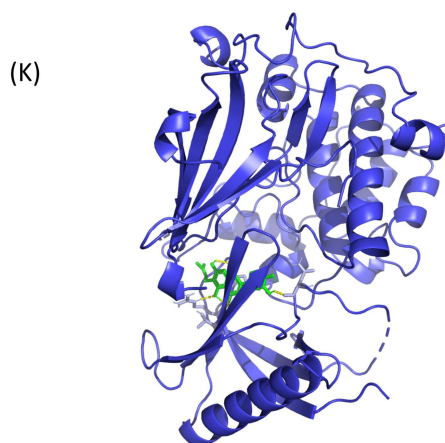

AKT1- chromone O: -8.8 kcal/mol

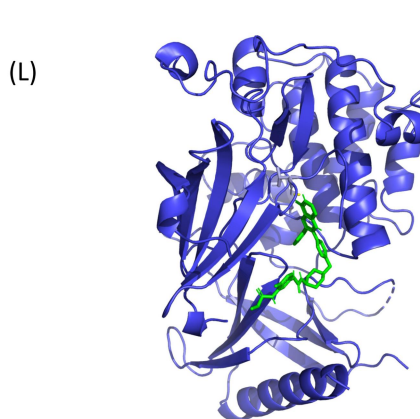

AKT-1-Positive control: -9.01 kcal/mol

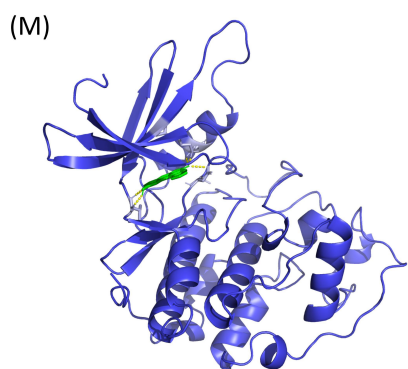

CDK2- 3,4-methylenedioxy:  
-7.99 kcal/mol

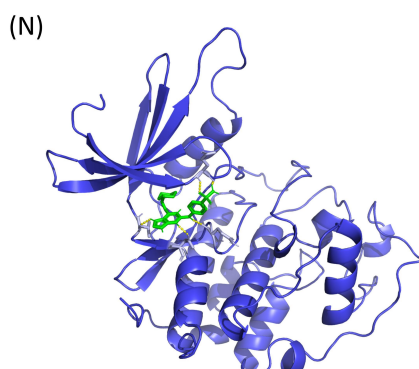

CDK2-Positive control: -7.58 kcal/mol

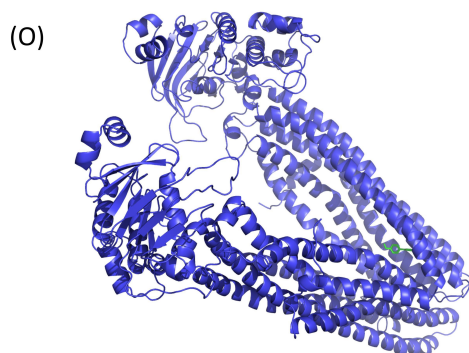

ABCB1-formononetin: -7.19  
kcal/mol

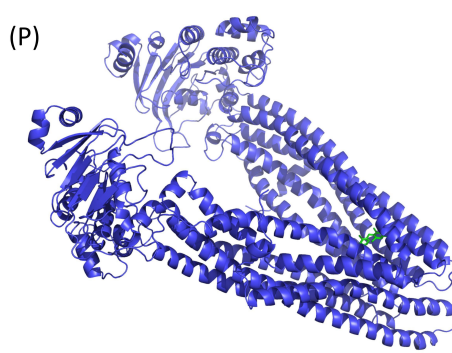

ABCB1-Positive control: -6.27  
kcal/mol

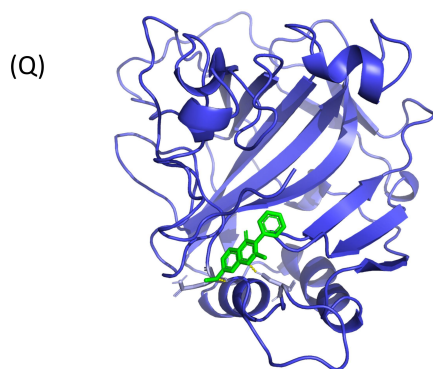

CA1- 7-methoxy-2 methylisoflavone: -  
7.18 kcal/mol

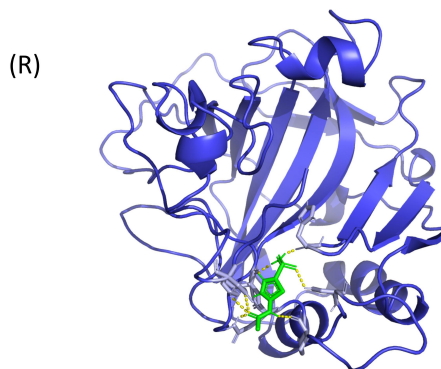

CA1-Positive control: -5.7  
kcal/mol

FigureS2 The binding patterns between active ingredients, positive control and targets

(A) CA2 with Karenzu DK2; (B) CA2 with positive control; (C) EP300 with vanillin; (D) EP300 with positive control; (E) CREB1 with wogonin; (F) CREB1 with positive control; (G) EP300 with cis-ferulic acid; (H) EP300 with positive control; (I) RELA with oleanolic acid; (J) RELA with positive control; (K) AKT1 with chromone O; (L) AKT1 with positive control; (M) CDK2 with 3,4-methylenedioxy; (N) CDK2 with positive control; (O) ABCB1 with formononetin; (P) ABCB1 with positive control; (Q) CA1 with 7-methoxy-2-methylisoflavone; (R) CA1 with positive control
